# Supplementary material for: Use of AXL-specific CAR T cells to treat non-small-cell lung cancer
Source: Research Square preprint supplement (doi:10.21203/rs.3.rs-244810/v1), 2021-02-16

广州医科大学附属第二医院  
临床研究与应用伦理委员会快速审查批件

张振峰同志提交的科研伦理审查项目“靶向 AXL 的 CAR-T 细胞构建及其对非小细胞肺癌杀伤作用的研究”（受理号：2019-ks-23），经过广州医科大学附属第二医院临床研究与应用伦理委员会快速审查，其研究内容和方法符合医学伦理规范和要求，同意开展该临床研究。

广州医科大学附属第二医院临床研究与应用伦理委员会

主任委员签名：



2019年10月8日

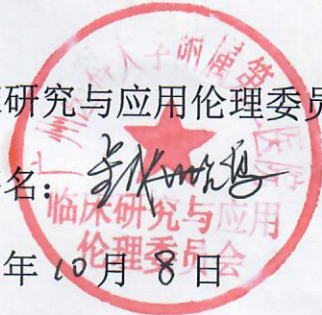

Supplement: Supplementary file 1 [file c6442684ffbdf0d1fe5d05de.pdf]
